# Supplementary material for: Electronically interacting single wall carbon nanotube–porphyrin nanohybrids
Source: Royal Society of Chemistry journal article supplement (doi:10.1039/b515394h), 2005-11-25
Supplement: b515394h.pdf [file b515394h.pdf]

# Electronically interacting single wall carbon nanotube – porphyrin nano hybrids

G. M. Aminur Rahman,<sup>a</sup> Dirk M. Guldi,<sup>\*a</sup> Stéphane Campidelli<sup>b</sup> and Maurizio Prato<sup>\*b</sup>

5

## SUPPLEMENTARY INFORMATION

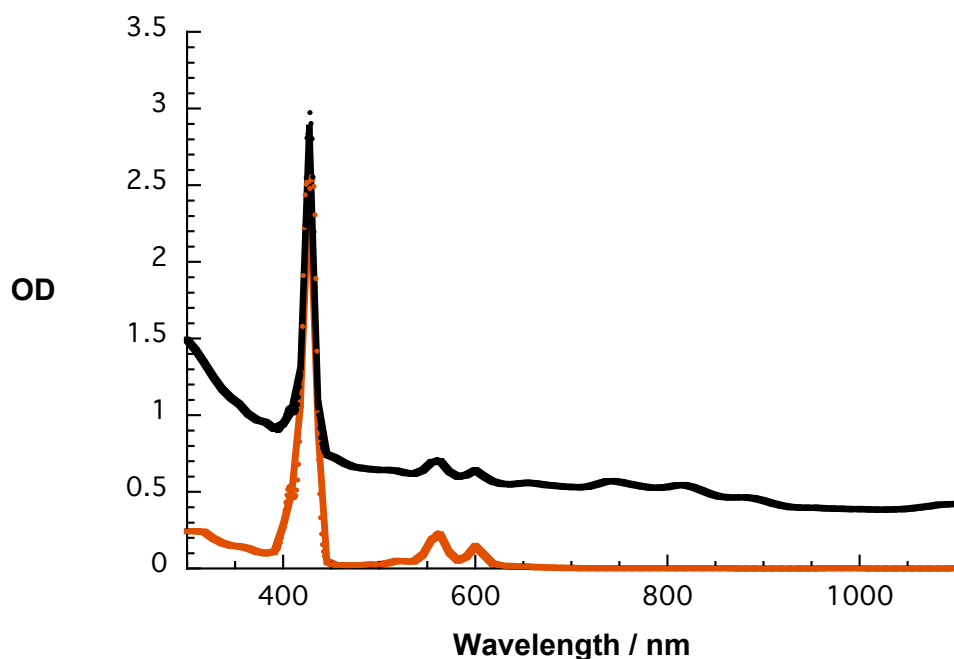

**Fig. S1** Absorption spectra of ZnP (orange) and SWNT / ZnP (black) in DMF.

10

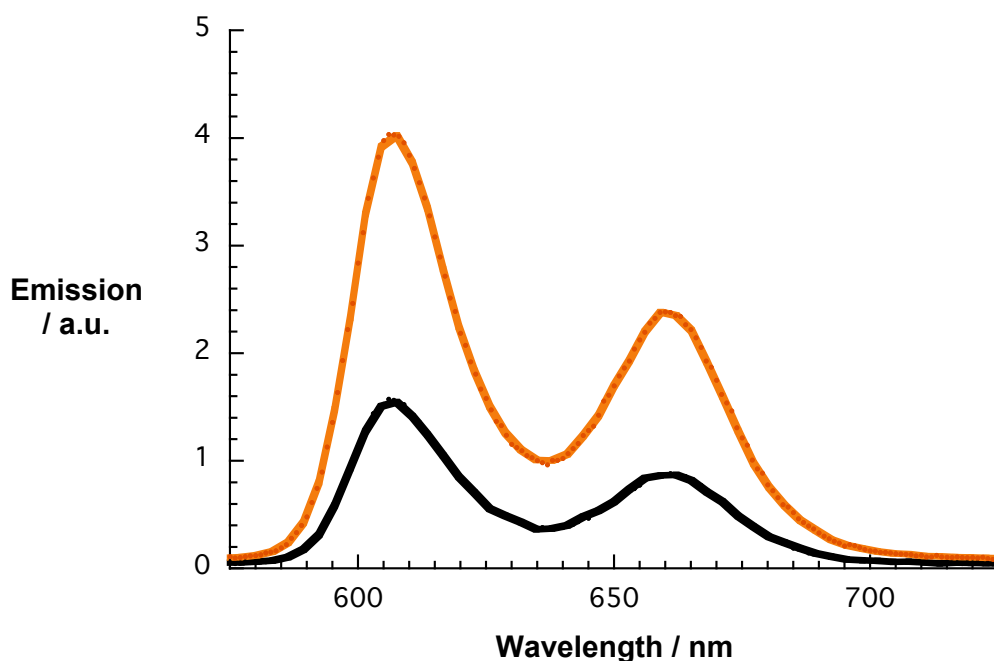

**Fig. S2** Room temperature fluorescence spectra of ZnP (orange) and SWNT / ZnP (black) in DMF with matching absorption at the 427 nm excitation wavelength.

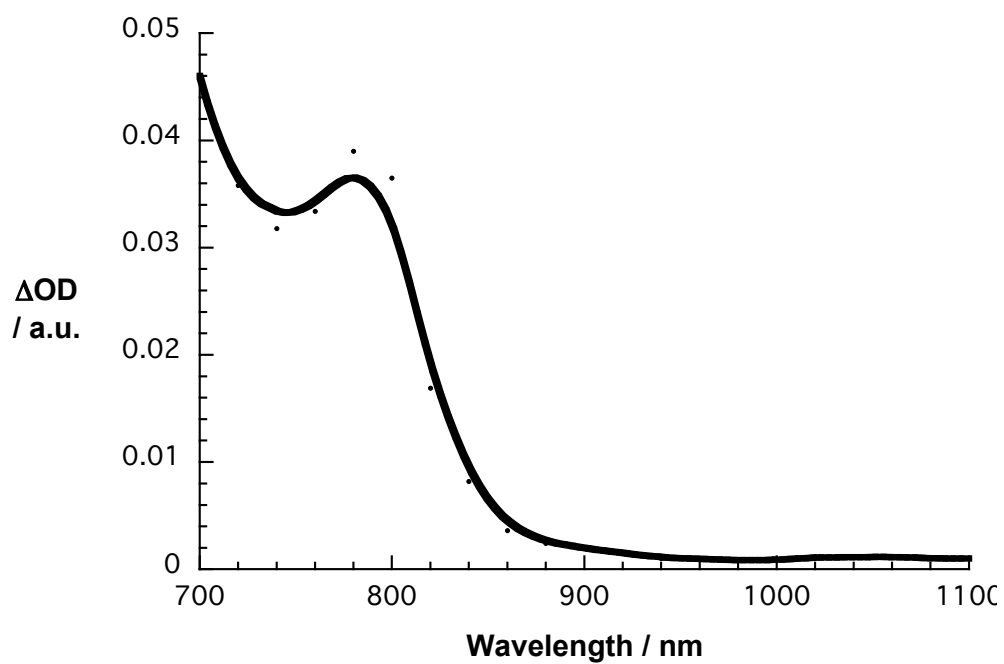

15 **Fig. S3** Differential absorption spectrum (near-infrared) obtained upon nanosecond flash photolysis (532 nm) of  $H_2P$  in nitrogen saturated DMF with a 50 ns time delay at room temperature.

---
